# Supplementary material for: Comprehensive Genetic Analysis Reveals Complexity of Monogenic Urinary Stone Disease
Source: PubMed Central journal article supplement — Kidney Int Rep. 2021 Sep 8;6(11):2862–84. doi: 10.1016/j.ekir.2021.08.033 (PMC8589729; doi:10.1016/j.ekir.2021.08.033), 2021-09-08
Supplement: mmc1.pdf [file mmc1.pdf]

## Comprehensive genetic analysis reveals complexity of monogenic urinary stone disease

Andrea G. Cogal B.S.<sup>a\*</sup>, Jennifer Arroyo Ph.D.<sup>a\*</sup>, Ronak Jagdeep Shah M.D.<sup>a</sup>, Kalina J. Reese B.S.<sup>b</sup>, Brenna N. Walton B.S.<sup>b</sup>, Laura M. Reynolds B.S.<sup>b</sup>, Gabrielle N. Kennedy<sup>b</sup>, Barbara M. Seide<sup>a</sup>, Sarah R. Senum B.S.<sup>a</sup>, Michelle Baum M.D.<sup>c</sup>, Stephen B. Erickson M.D.<sup>a</sup>, Sujatha Jagadeesh M.D.<sup>d</sup>, Neveen A. Soliman M.D.<sup>e</sup>, David S Goldfarb M.D.<sup>f</sup>, Lada Beara-Lasic M.D.<sup>f</sup>, Vidar O. Edvardsson M.D.<sup>g, h</sup>, Runolfur Palsson M.D.<sup>g, i</sup>, Dawn S. Milliner M.D.<sup>a</sup>, David J. Sas D.O.<sup>a, j, k</sup>, John C. Lieske M.D.<sup>a, k</sup>, Peter C. Harris Ph.D.<sup>a, b</sup>, and Investigators of the Rare Kidney Stone Consortium

<sup>a</sup>Division of Nephrology and Hypertension, <sup>b</sup>Department of Biochemistry and Molecular Biology, <sup>j</sup>Division of Pediatric Nephrology and Hypertension, and <sup>k</sup>Department of Laboratory Medicine and Pathology, Mayo Clinic, Rochester, MN, US; <sup>c</sup>Children's Hospital, Boston, MA, US; <sup>d</sup>Mediscan Systems, Mylapore, Chennai, Tamil Nadu, India; <sup>e</sup>Department of Pediatrics, Center of Pediatric Nephrology and Transplantation, Kasr Al Ainy School of Medicine, Cairo University, Cairo, Egypt; <sup>f</sup>Nephrology Division, New York University Langone Health and New York University School of Medicine, New York, NY, US; <sup>g</sup>Faculty of Medicine, School of Health Sciences, University of Iceland, <sup>h</sup>Children's Medical Center, and <sup>i</sup>Division of Nephrology, Landspítali–The National University Hospital of Iceland, Reykjavik, Iceland.

\* Contributed equally to the study

Corresponding Authors:

Peter C. Harris, Ph.D. and John C. Lieske, M.D.

Division of Nephrology and Hypertension

Mayo Clinic College of Medicine

200 1<sup>st</sup> Street SW

Rochester, MN 55905

Tel: (507) 266 0541 or 266 7960 Fax: (507) 266 9315

E-mails:

[harris.peter@mayo.edu](mailto:harris.peter@mayo.edu)

[lieske.john@mayo.edu](mailto:lieske.john@mayo.edu)

## SUPPLEMENTAL METHODS

**NGS library generation and sequencing:** We employed the SureSelect (Agilent) method (capture probes designed using SureDesign) to capture coding exons, plus 50bp flanking IVS regions and the UTRs of the selected genes. A tiling density of 5 probes overlapping with every base was used to improve the capture efficiencies and the least stringent masking of repeat regions to include repeats shorter than the length of the sequencing libraries (~250bp fragments). In addition, the appropriate boosting parameters were set to different levels of probe replications in different regions to minimize the local coverage differences (e.g. between regions of different GC contents).

Paired-end indexed libraries were prepared using the NEBNext Ultra library preparation kit with Illumina barcode adaptors. Targeted sequence was captured using the SureSelect Custom capture protocol on an Agilent Bravo liquid handler (RKSC Mayo Laboratory) following the manufacturer's protocol, with the captured DNA fragmented using the Covaris E-220 sonicator. Adapter ligated DNA fragments were size selected to enrich for ~350bp fragments using a double SPRI bead purification. The concentration and size distribution of the libraries were determined on an Agilent Bioanalyzer DNA 1000 chip. Individual patient samples (n=24) were pooled before capture and two pools (48 samples) sequenced on a HiSeq4000 system lane (Illumina). The degree of multiplexing resulted in an average sequencing depth per base of ~800 reads.

**Variant identification:** Read QC and alignment, variant calling, and variant/gene annotation were performed using the Mayo in-house analytic pipeline GenomeGPS (GGPS). The Accession numbers of the transcripts and proteins are shown in Table S3. Specifically, read qualities were examined by FastQC (<http://www.bioinformatics.bbsrc.ac.uk/projects/fastqc>) and reads aligned to the reference genome (hg19) using alignment tools BWA and Samtools, duplicate reads eliminated using Picard, and realignment and recalibration performed through GATK before variant calling. The obtained VCF files were then analyzed by the RKSC SVS pipeline (Golden Helix: Version 8.9.0). A series of filters were applied: quality filter of read depth  $\geq 10x$  and genotype quality  $\geq 20$ , removal of Genome Aggregation Database (gnomAD)<sup>1</sup> variants with a minor allele frequency  $>1\%$ , characterization of coding and non-coding SNVs within +6 and -20bp of the splice site (in secondary analysis some deeper intronic changes were assessed), and subsequent removal of SNPs predicted to be neutral by 4/6 dbNSFP tools (SIFT, PolyPhen-2 HVAR, MutationTaster, Mutation Assessor, FATHMM, and FATHMM MKL). CNV screening by LOG2 ratio of reads of the NGS was applied to all genes in the panel<sup>2</sup>. Microarray analysis (ThermoFisher Cytoscan HD) was employed to further characterize large CNV abnormalities.

**Variant evaluation:** Possible pathogenic variants were verified by Sanger sequencing, or multiplex ligation-dependent probe amplification (MLPA) for CNV, and traced in families where possible. Variants of unknown significance (VUS) were further assessed for previous description (HGMD<sup>3</sup>, ClinVar<sup>4</sup> and the literature), frequency in gnomAD<sup>1</sup>, ortholog and domain conservation evaluated by multisequence alignments, and evaluation for splicing using the Berkeley Drosophila Genome Project (BDGP) Splice Site Prediction by Neural Network and Genomnis Human Splice Finder (HSF) sites<sup>5, 6</sup>.

Reporting of results was according to the ACMG guidelines ([https://www.medschool.umaryland.edu/genetic\\_variant\\_interpretation\\_tool1.html/](https://www.medschool.umaryland.edu/genetic_variant_interpretation_tool1.html/))<sup>7</sup>.

## References

1. Karczewski, KJ, Francioli, LC, Tiao, G, et al.: The mutational constraint spectrum quantified from variation in 141,456 humans. *Nature*, 581: 434-443, 2020.
2. Hopp, K, Cornec-Le Gall, E, Senum, SR, et al.: Detection and characterization of mosaicism in autosomal dominant polycystic kidney disease. *Kidney Int*, 97: 370-382, 2020.
3. Stenson, PD, Mort, M, Ball, EV, et al.: The Human Gene Mutation Database (HGMD<sup>®</sup>): optimizing its use in a clinical diagnostic or research setting. *Hum Genet*, 139: 1197-1207, 2020.
4. Landrum, MJ, Lee, JM, Benson, M, et al.: ClinVar: improving access to variant interpretations and supporting evidence. *Nucleic Acids Res*, 46: D1062-D1067, 2018.
5. Reese, MG, Eeckman, FH, Kulp, D, et al.: Improved splice site detection in Genie. *J Comput Biol*, 4: 311-323, 1997.
6. Desmet, F, Hamroun, D, Lalande, M, et al.: Human Splicing Finder: an online bioinformatics tool to predict splicing signals. *Nucleic Acids Res* 37: e67, 2009
7. Richards, S, Aziz, N, Bale, S, et al.: Standards and guidelines for the interpretation of sequence variants: a joint consensus recommendation of the American College of Medical Genetics and Genomics and the Association for Molecular Pathology. *Genet Med*, 17: 405-424, 2015.

**SUPPLEMENTAL FIGURE**

Figure S1

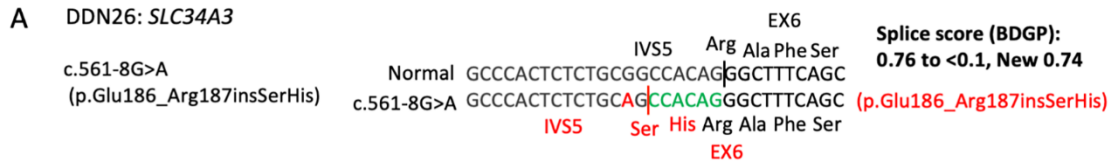

**FIGURE S1: DDN26 has an inframe duplication of *SLC34A1*** (A) DDN26 has an inframe duplication of *SLC34A1*, c.460\_480dup (p.Ile154\_Val160dup). In addition, we detected a possible novel atypical splicing change of *SLC34A3*, c.561-8G>A that may result in the insertion of two amino acids, p.Glu186\_Arg187insSerHis, and has been classed as a VUS.

SUPPLEMENTAL TABLES

Table S1: Genes on the 90 gene and 102 gene panels

|    | Gene Name | NM             | Gene ID | Chr          |     | Gene Name  | NM             | Gene ID | Chr           |
|----|-----------|----------------|---------|--------------|-----|------------|----------------|---------|---------------|
| 1  | ABCG2     | NM_004827.2    | 9429    | 4q22         | 52  | KL         | NM_004795.3    | 9365    | 13q12         |
| 2  | ACLY      | NM_001303274.1 | 47      | 17q12-q21    | 53  | OCRL       | NM_000276.3    | 4952    | Xq25-Xq26.1   |
| 3  | ACO2      | NM_001098.2    | 50      | 22q13.2      | 54  | OGDH       | NM_002541.3    | 4967    | 7p14-p13      |
| 4  | ADCY10    | NM_018417.5    | 55811   | 1q23.3-q24   | 55  | OXSR1      | NM_005109.2    | 9943    | 3p22.2        |
| 5  | AGTR1     | NM_031850.3    | 185     | 3q21-q25     | 56  | PCK1       | NM_002591.3    | 5105    | 20q13.31      |
| 6  | AGXT      | NM_000030.2    | 189     | 2q36-q37     | 57  | PRPS1      | NM_002764.3    | 5631    | Xq22.3        |
| 7  | AHSG      | NM_001622.2    | 197     | 3q27         | 58  | RHBG       | NM_020407.4    | 57127   | 1q21.3        |
| 8  | ALPL      | NM_000478.4    | 249     | 1p36.12      | 59  | RHCG       | NM_016321.2    | 51458   | 15q25         |
| 9  | AMBP      | NM_001633.3    | 259     | 9q32-q33     | 60  | SLC12A1    | NM_000338.2    | 6557    | 15q15-q21.1   |
| 10 | APLN      | NM_017413.4    | 8862    | Xq25-q26.3   | 61  | SLC12A3    | NM_000339.2    | 6559    | 16q13         |
| 11 | APLNR     | NM_005161.4    | 187     | 11q12        | 62  | SLC13A2    | NM_001145975.1 | 9058    | 17p13.2       |
| 12 | APRT      | NM_000485.2    | 353     | 16q24        | 63  | SLC17A3    | NM_001098486.1 | 10786   | 6p21.3        |
| 13 | AQP2      | NM_000486.5    | 359     | 12q12-q13    | 64  | SLC22A12   | NM_144585.3    | 116085  | 11q13.1       |
| 14 | ATP2B1    | NM_001682.2    | 490     | 12q21.3      | 65  | SLC22A6    | NM_004790.4    | 9356    | 11q12.3       |
| 15 | ATP6VOA4  | NM_020632.2    | 50617   | 7q33-34      | 66  | SLC22A8    | NM_004254.3    | 9376    | 11q11         |
| 16 | ATP6V1B1  | NM_001692.3    | 525     | 2p13.1       | 67  | SLC26A1    | NM_213613.3    | 10861   | 4p16.3        |
| 17 | ATP4B     | NM_000705.3    | 496     | 13q34        | 68  | SLC26A6    | NM_022911.2    | 65010   | 3q21.3        |
| 18 | ATP1A1    | NM_001160233.1 | 476     | 1p21         | 69  | SLC2A9     | NM_020041.2    | 56606   | 4p16-p15.3    |
| 19 | ATP1A2    | NM_000702.3    | 477     | 1q23.2       | 70  | SLC34A1    | NM_003052.4    | 6569    | 5q35          |
| 20 | AVP       | NM_000490.4    | 551     | 20p13        | 71  | SLC34A3    | NM_001177316.1 | 142680  | 9q34          |
| 21 | AVPR2     | NM_000054.4    | 554     | Xq28         | 72  | SLC38A3    | NM_006841.5    | 10991   | 3p21.3        |
| 22 | BSND      | NM_057176.2    | 7809    | 1p32.1       | 73  | SLC3A1     | NM_000341.3    | 6519    | 2p16.3        |
| 23 | CA2       | NM_000067.2    | 760     | 8q22         | 74  | SLC4A1     | NM_000342.3    | 6521    | 17q21-q22     |
| 24 | CALB1     | NM_004929.3    | 793     | 8q21.3-q22.1 | 75  | SLC4A4     | NM_001098484.2 | 8671    | 4q21          |
| 25 | CASR      | NM_001178065.1 | 846     | 3q21.1       | 76  | SLC4A7     | NM_003615.4    | 9497    | 3p22          |
| 26 | CAV1      | NM_001753.4    | 857     | 7q31.1       | 77  | SLC5A12    | NM_178498.3    | 159963  | 11p14.2       |
| 27 | CLCN5     | NM_001127899.3 | 1184    | Xp11.22      | 78  | SLC5A8     | NM_145913.3    | 160728  | 12q23.1-q23.2 |
| 28 | CLCNKB    | NM_000085.4    | 1188    | 1p36         | 79  | SLC7A9     | NM_014270.4    | 11136   | 19q13.1       |
| 29 | CLDN14    | NM_144492.2    | 23562   | 21q22.3      | 80  | SLC7A13    | NM_138817.2    | 157724  | 8q21.3        |
| 30 | CLDN16    | NM_006580.3    | 10686   | 3q28         | 81  | SLC8A1     | NM_021097.2    | 6546    | 2p23-p22      |
| 31 | CLDN19    | NM_148960.2    | 149461  | 1p34.2       | 82  | SLC9A3     | NM_004174.2    | 6550    | 5p15.3        |
| 32 | CYP24A1   | NM_000782.4    | 1591    | 20q13        | 83  | SLC9A3R1   | NM_004252.4    | 9368    | 17q25.1       |
| 33 | CYP27B1   | NM_000785.3    | 1594    | 12q14.1      | 84  | SPP1       | NM_001251830.1 | 6696    | 4q21-q25      |
| 34 | CYP2R1    | NM_024514.4    | 120227  | 11p15.2      | 85  | STK39      | NM_013233.2    | 27347   | 2q24.3        |
| 35 | DGKH      | NM_178009.4    | 160851  | 13q14.1      | 86  | TRPV5      | NM_019841.6    | 56302   | 7q35          |
| 36 | DOLPP1    | NM_020438.4    | 57171   | 9q34.1       | 87  | UMOD       | NM_001278614.1 | 7369    | 16p12.3       |
| 37 | DPM2      | NM_003863.3    | 8818    | 9q34.13      | 88  | VDR        | NM_001017536.1 | 7421    | 12q12-q14     |
| 38 | ECM2      | NM_001393.3    | 1842    | 9q22.3       | 89  | WNK4       | NM_032387.4    | 65266   | 17q21-q22     |
| 39 | F2        | NM_000506.3    | 2147    | 11p11        | 90  | XDH        | NM_000379.3    | 7498    | 2p23.1        |
| 40 | FAM188B   | NM_032222.2    | 84182   | 7p14.3       | 91  | ANO4       | NM_001286615   | 121601  | 12q23.1       |
| 41 | FAM20A    | NM_017565.3    | 54757   | 17q24.2      | 92  | BAZ1B/WSTF | NM_032408.3    | 9031    | 7q11.23       |
| 42 | FGF23     | NM_020638.2    | 8074    | 12p13.3      | 93  | CLDN3      | NM_001306      | 1365    | 7q11.23       |
| 43 | GLS       | NM_014905.4    | 2744    | 2q32-q34     | 94  | CLDN4      | NM_001305.4    | 1364    | 7q11.23       |
| 44 | GLUD1     | NM_005271.3    | 2746    | 10q23.3      | 95  | HIP1       | NM_005338.6    | 3092    | 7q11.23       |
| 45 | GRHPR     | NM_012203.1    | 9380    | 9q12         | 96  | LRP2       | NM_004525.2    | 4036    | 2q31.1        |
| 46 | HNF4A     | NM_000457.4    | 3172    | 20q13.12     | 97  | OXGR1      | NM_001346194   | 27199   | 13q32.1       |
| 47 | HOGA1     | NM_138413.3    | 112817  | 10q24.2      | 98  | PBX1       | NM_002585.3    | 5087    | 1q23.3        |
| 48 | HPRT1     | NM_000194.2    | 3251    | Xq26.1       | 99  | SLC26A11   | NM_001166347.1 | 284129  | 17q25.3       |
| 49 | HSPG2     | NM_001291860.1 | 3339    | 1p36.1-p34   | 100 | SLC39A10   | NM_001127257.1 | 57181   | 2q32.3        |
| 50 | IGFBP7    | NM_001253835.1 | 3490    | 4q12         | 101 | TBL2       | NM_012453      | 26608   | 7q11.23       |
| 51 | KCNJ1     | NM_000220.4    | 3758    | 11q24        | 102 | TRPM6      | NM_017662      | 140803  | 9q21.13       |

Shaded genes are only present on the 102 gene panel

**Table S2: Details of novel Sanger detected PH and DD gene pathogenic variants**

| Family ID         | Variant description                        | Variant type | GnomAD freq | Clin Var        | Splicing evaluation      |                            | Missense evaluation |       |     | ACMG evaluation |                     | Other allele                               | Phenotype                          |
|-------------------|--------------------------------------------|--------------|-------------|-----------------|--------------------------|----------------------------|---------------------|-------|-----|-----------------|---------------------|--------------------------------------------|------------------------------------|
|                   |                                            |              |             |                 | HSF                      | BDGP                       | Pre                 | Ortho | Dom | Class           | Evidence            |                                            |                                    |
| <b>AGXT: PH1</b>  |                                            |              |             |                 |                          |                            |                     |       |     |                 |                     |                                            |                                    |
| PH1-01            | c.165_172dup (p.Ala294fs21*)               | F/S Dup      | None        | None            | NA                       | NA                         | NA                  | NA    | NA  | Path lc         | PVS1, PM2, PP4      | c.725dupT (p.Lys242fs)                     | M, On 3y, BNL, NC                  |
| PH1-02            | c.166-11_-8del_insTGCATGCAG AT (p.Ile56fs) | Splice       | None        | None            | 78.3 to 78.1, new -9, 80 | 0.96 to 0.51, new -9, 0.47 | NA                  | NA    | NA  | LP V            | PM2, PM3, PP3, PP4  | c.166-11_-8del_insTGCATGCAG AT (p.Ile56fs) | M, C, On 1.5y, BNL, COD/COM        |
| PH1-03            | c.191T>A (p.Ile64Asn)                      | Mis          | None        | None            | NA                       | NA                         | 3/3                 | 7/7   | 2/9 | LP V            | PM2, PM5, PP3, PP4  | c.577delC (p.L193fs18*)                    | F, On 6y, ESKD, CHF, >U/Ox, PN     |
| PH1-04            | c.224delC (p.Thr75fs44*)                   | F/S Del      | None        | None            | NA                       | NA                         | NA                  | NA    | NA  | Path lb         | PVS1, PM2, PM3, PP4 | c.358G>A (p.Gly120Arg)                     | F, On 2y, NC, >U/Ox                |
| PH1-05            | c.352C>T (p.Arg118Cys)                     | Mis          | 18/260376   | 1x VUS; 1x PATH | NA                       | NA                         | 3/3                 | 7/7   | 6/9 | VUS             | PM5, PP3, PP4, PP5  | c.33dupC (p.Pro11fs33X)                    | F, Onset 17y, NL, >U/Ox, CKD IV    |
| PH1-04            | c.358G>A (p.Gly120Arg)#                    | Splice       | 1/222688    | 1x VUS          | 95.9 to 85.8             | 0.99 to 0.74               | 3/3                 | 7/7   | NA  | LP V            | PM2, PM3, PP3, PP4  | c.224delC (p.Thr75fs44*)                   | F, On 2y, NC, >U/Ox                |
| PH1-06            |                                            |              |             |                 |                          |                            |                     |       |     |                 |                     | c.358G>A (p.Gly120Arg)                     | F, C, On 3m: EK, CKD, MBD          |
| PH1-07            | c.638C>A (p.Ala213Asp)                     | Mis          | 1/31388     | None            | NA                       | NA                         | 2/3                 | 6/7   | NA  | VUS             | PM2, PP3, PP4       | c.774G>T (p.Arg258Ser)                     | M: An, HTN, ESKD                   |
| PH1-08            | c.766delC (p.Gln256fs16*)                  | F/S Del      | None        | None            | NA                       | NA                         | NA                  | NA    | NA  | Path lb         | PVS1, PM2, PM3, PP4 | c.766delC (p.Gln256fs16*)                  | M, On 4y                           |
| PH1-07            | c.774G>T (p.Arg258Ser)                     | Mis          | 6/282566    | None            | NA                       | NA                         | 3/3                 | 7/7   | NA  | VUS             | PP3, PP4            | c.638C>A (p.Ala213Asp)                     | M: An, HTN, ESKD                   |
| PH1-09            | c.824G>T (p.Ser275Ile)                     | Mis          | 1/251318    | None            | NA                       | NA                         | 3/3                 | 6/7   | 1/9 | LP V            | PM2, PM5, PP3, PP4  | c.508G>A (p.Gly170Arg)                     | M, On 14y, >U/Ox                   |
| PH1-14            | (c.846+?_c.1179+?)del (p.Gly283fs)         | L del        | None        | None            | NA                       | NA                         | NA                  | NA    | NA  | Path lb         | PVS1, PM2, PM3, PP4 | (c.846+?_c.1179+?)del (p.Gly283fs)         | M, On 5y, BNL                      |
| PH1-10            | c.847-12_-6del (p.Gly283fs)                | Splice       | None        | None            | 91.5 to 41.0             | 0.59 to 0.14               | NA                  | NA    | NA  | VUS             | PM2, PP3, PP4       | c.976delG (p.Ala325fs)                     | F, On 1y, Hm, Au, Ur, MC           |
| PH1-11            | c.869_882dup (p.Ala294fs21*)               | F/S Dup      | None        | None            | NA                       | NA                         | NA                  | NA    | NA  | Path lb         | PVS1, PM2, PM3, PP4 | c.869_882dup (p.Ala294fs21*)               | M, On 3y: NC, NL, >U/Ox            |
| PH1-12            | c.959_960delCA (p.Thr320fs9*)              | F/S Del      | None        | None            | NA                       | NA                         | NA                  | NA    | NA  | Path lb         | PVS1, PM2, PM3, PP4 | c.846+1G>T (p.Gln282fs)                    | F, Onset 1y, >U/Ox, NC, HTN, L Tx, |
| PH1-13            | c.995G>A (p.Trp332*)                       | Nons         | 1/31384     | None            | NA                       | NA                         | NA                  | NA    | NA  | Path lc         | PVS1, PM2, PP4      | c.508G>A (p.Gly170Arg)                     | M, On 25y: NL, SC, Neph            |
| <b>GRHPR: PH2</b> |                                            |              |             |                 |                          |                            |                     |       |     |                 |                     |                                            |                                    |
| PH2-01            | c.109_118delinsCAC (p.Asp37fs6*)           | F/S InDel    | None        | None            | NA                       | NA                         | NA                  | NA    | NA  | Path lc         | PVS1, PM2, PP4      | c.493+2T>A (p.Gly165fs)                    | M, On1y: NL, NC >U/Ox              |
| PH2-02            | c.501delC (p.Ala167fs5*)                   | F/S Del      | None        | None            | NA                       | NA                         | NA                  | NA    | NA  | Path lb         | PVS1, PM2, PM3, PP4 | c.501delC (p.Ala167fs5*)                   | M; CKD3, >U/Ox                     |
| PH2-03            | c.783delT (p.Gly261fs8*)                   | F/S Del      | None        | None            | NA                       | NA                         | NA                  | NA    | NA  | Path lb         | PVS1, PM2, PM3, PP4 | c.783delT (p.Gly261fs8*)                   | F: NL, >U/Ox, ESKD, HTN            |

| Family ID         | Variant description                   | Variant type | GnomAD freq  | ClinVar            | Splicing evaluation |              | Missense evaluation |       |       | ACMG evaluation |                          | Other allele                          | Phenotype                             |
|-------------------|---------------------------------------|--------------|--------------|--------------------|---------------------|--------------|---------------------|-------|-------|-----------------|--------------------------|---------------------------------------|---------------------------------------|
|                   |                                       |              |              |                    | HSF                 | BDGP         | Pre                 | Ortho | Dom   | Class           | Evidence                 |                                       |                                       |
| <b>HOGA1: PH3</b> |                                       |              |              |                    |                     |              |                     |       |       |                 |                          |                                       |                                       |
| PH3-01            | c.123delT<br>(p.Pro41fs1*)            | F/S Del      | None         | 3x PATH            | NA                  | NA           | NA                  | NA    | NA    | Path Ia         | PVS1, PM2, PM3, PP1, PP4 | c.700+5G>T<br>(p.Leu233ins17)         | F, On 1y, BNL, >U/Ox                  |
| PH3-02            | c.212G>T<br>(p.Gly71Val)##            | Mis          | None         | None               | UC                  | 0.95 to 0.79 | 3/3                 | 7/7   | 8/10  | LP V            | PM1, PM2, PP3, PP4       | c.331G>A<br>(p.Gly111Arg)             | M, On 16y, BNL, COM, CKD2, >U/Ox      |
| PH3-03            | c.234T>A<br>(p.Asn78Lys)              | Mis          | 7/<br>251490 | None               | NA                  | NA           | 1/3                 | 4/7   | 2/10  | LP V            | PM2, PM3, PP3, PP4       | c.208C>T<br>(p.Arg70*)                | F, On 6y: NL, dCS, HC, >U/Ox          |
| PH3-02            | c.331G>A<br>(p.Gly111Arg)             | Mis          | 9/<br>282700 | 1x LP              | NA                  | NA           | 3/3                 | 7/7   | 8/10  | LP V            | PM1, PM2, PP3, PP4       | c.212G>T<br>(p.Gly71Val)              | M, On 16y, BNL, COM, CKD2, >U/Ox      |
| PH3-04            | c.385G>A<br>(p.Gly129Arg)             | Mis          | 4/<br>250696 | None               | NA                  | NA           | 3/3                 | 7/7   | 10/10 | LP V            | PM2, PM3, PP3, PP4       | c.289C>T<br>(Arg97Cys)                | M, On 25y: NL, COM, SC, Neph, >U/Ox   |
| PH3-05            |                                       |              |              |                    |                     |              |                     |       |       |                 |                          | c.385G>A<br>(Gly129Arg)               | F, On 2y, BNL, RD                     |
| PH3-06            | c.533T>A<br>(p.Leu178Gln)             | Mis          | 1/<br>251486 | None               | NA                  | NA           | 3/3                 | 7/7   | 4/10  | LP V            | PM2, PM3, PP3, PP4       | c.700+5G>T<br>(p.Leu233ins17)         | F, On 8y, NL, >U/Ox, SS, KC, CKD II   |
| PH3-07            | c.533T>C<br>(p.Leu178Pro)#            | Mis          | None         | 1x PATH            | NA                  | NA           | 3/3                 | 7/7   | 4/10  | LP V            | PM2, PM3, PP3, PP4       | c.535C>A<br>(p.Pro179Thr)             | M, On 2y, BNL, CaOx, CKD              |
|                   | c.535C>A<br>(p.Pro179Thr)#            | Mis          | None         | 1x VUS;<br>1x PATH | NA                  | NA           | 2/3                 | 7/7   | 2/10  | LP V            | PM2, PM3, PP3, PP4       | c.533T>C<br>(p.Leu178Pro)             |                                       |
| PH3-08            | c.713delG<br>(p.Gly238fs41*)          | F/S Del      | 1/<br>250710 | 1x VUS             | NA                  | NA           | NA                  | NA    | NA    | Path Ib         | PVS1, PM2, PM3, PP4      | c.700+5G>T<br>(p.Leu233ins17)         | M, On 1y, NL, >U/Ox                   |
| PH3-09            | c.733G>T<br>(p.Val245Phe)             | Mis          | 5/<br>282018 | None               | NA                  | NA           | 3/3                 | 7/7   | 5/10  | VUS             | PM2, PP3, PP4, PP5       | c.818T>C<br>(p.Ile273Thr)             | M, On 25y, NL, CaOx, HC, >U/Ox,       |
| PH3-10            |                                       |              |              |                    |                     |              |                     |       |       |                 |                          | c.700+5G>T<br>(p.Leu233ins17)         | M, No information                     |
| PH3-09            | c.818T>C<br>(p.Ile273Thr)             | Mis          | 6/<br>246346 | None               | NA                  | NA           | 3/3                 | 7/7   | 1/10  | VUS             | PM2, PP3, PP4            | c.733G>T<br>(p.Val245Phe)             | M, On 25y, NL, CaOx, HC, >U/Ox,       |
| PH3-11            | c.943_954dup<br>(p.Glu315_ Arg318dup) | I/F Dup      | 8/<br>251186 | 1x VUS             | NA                  | NA           | NA                  | NA    | NA    | LP IV           | PM2, PM3, PM4, PP3, PP4  | c.943_954dup<br>(p.Glu315_ Arg318dup) | F, On 50y, BNL, >U/Ox HC, CKD3        |
| <b>CLCN5 :DD1</b> |                                       |              |              |                    |                     |              |                     |       |       |                 |                          |                                       |                                       |
| D1-01             | c.105+4delA<br>(p.Glu35*)             | Splice       | None         | None               | 95.9 to 75.5        | 1.00 to 0.42 | NA                  | NA    | NA    | LP V            | PM2, PP1-M, PP3, PP4     | N                                     | M, On 4y, HC, Pr, NC                  |
| D1-02             | c.122_123delAA<br>(p.Lys41fs11*)      | F/S Del      | None         | None               | NA                  | NA           | NA                  | NA    | NA    | Path Ic         | PVS1, PM2, PP4           | N                                     | M, On 3y, HC Pr, NC                   |
| D1-03             | c.314_315delCT<br>(p.Ser105fs1*)      | F/S Del      | None         | None               | NA                  | NA           | NA                  | NA    | NA    | Path Ic         | PVS1, PM2, PP4           | N                                     | M, On 7y, Pr, NL, HC                  |
| D1-04             | c.356G>A<br>(p.Trp119*)               | Nons         | None         | None               | NA                  | NA           | NA                  | NA    | NA    | Path Ia         | PVS1, PP1-S, PM2, PP4    | N                                     | M, KTx 35y, Pr, NC, NL                |
| D1-05             | c.678C>G<br>(p.Cys226Trp)             | Mis          | None         | None               | NA                  | NA           | 3/3                 | 6/6   | 1/7   | LP V            | PM2, PP1-M, PP3, PP4     | N                                     | M, On 17y, Pr, FSGS, HC, VitD def, NL |
| D1-06             | c.1078delG<br>(p.Val360fs3*)          | F/S Del      | None         | None               | NA                  | NA           | NA                  | NA    | NA    | Path Ia         | PVS1, PP1-S, PM2, PP4    | N                                     | M, On 14y, Pr                         |
| D1-07             | c.1182dupT<br>(p.Leu394fs7*)          | F/S Dup      | None         | None               | NA                  | NA           | NA                  | NA    | NA    | Path Ib         | PVS1, PM2, PP1-M, PP4    | N                                     | M, On 3yr, Pr, NC                     |

| Family ID | Variant description                 | Variant type | GnomAD freq | ClinVar | Splicing evaluation |      | Missense evaluation |       |      | ACMG evaluation |                       | Other allele | Phenotype                     |
|-----------|-------------------------------------|--------------|-------------|---------|---------------------|------|---------------------|-------|------|-----------------|-----------------------|--------------|-------------------------------|
|           |                                     |              |             |         | HSF                 | BDGP | Pre                 | Ortho | Dom  | Class           | Evidence              |              |                               |
| D1-08     | c.1252_1255del (p.Pro419Leufs14*)   | F/S Del      | None        | None    | NA                  | NA   | NA                  | NA    | NA   | Path Ia         | PVS1, PP1-S, PM2, PP4 | N            | M, On 20y, Pr, HC, NL, KC, NC |
| D1-09     | c.1391_1392dup (p.Ile464fs5*)       | F/S Ins      | None        | None    | NA                  | NA   | NA                  | NA    | NA   | Path Ic         | PVS1, PM2, PP4        | N            | M, On 16y, Pr, NL, NC         |
| D1-10     | c.1574T>G (p.Met525Arg)             | Mis          | None        | None    | NA                  | NA   | 3/3                 | 6/6   | 5/10 | LP V            | PM1, PM2, PP3, PP4    | N            | M, On 2y, Pr, NC              |
| D1-11     | c.1592G>A (p.Gly531Asp)             | Mis          | None        | None    | NA                  | NA   | 3/3                 | 6/6   | 5/10 | VUS             | PM2, PP2, PP3, PP4    | N            | M, On 9y, Pr, FSGS, NC        |
| D1-12     | c.2240A>G (p.Ter747Wext*46)         | Non Stop     | 1/182596    | None    | NA                  | NA   | NA                  | NA    | NA   | LP IV           | PM2, PM4, PP1-M, PP4  | N            | M, On 7y, Pr                  |
| D1-13     | c.(1-?)_(205+1_206-1)del (p.Met1fs) | L Del        | None        | None    | NA                  | NA   | NA                  | NA    | NA   | Path Ic         | PVS1, PM2, PP4        | N            | M, On 8y, Pr, HC, CKD3        |

#### OCRL: DD2

|       |                            |         |      |         |    |    |     |     |       |           |                           |   |                             |
|-------|----------------------------|---------|------|---------|----|----|-----|-----|-------|-----------|---------------------------|---|-----------------------------|
| D2-01 | c.1156A>G (p.Arg386Gly)    | Mis     | None | None    | NA | NA | 3/3 | 7/7 | 10/10 | Path IIIb | PP1-S, PM1, PM2, PP3, PP4 | N | M, On 4y, Pr, FSGS, GS      |
| D2-02 | c.1573A>C (p.Lys525Gln)    | Mis     | None | 1x PATH | NA | NA | 6/6 | 7/7 | 10/10 | Path IIIb | PP1-S, PM1, PM2, PP3, PP4 | N | M, On 15y, Pr, RC, CDE, GHD |
| D2-03 | c.1865delG (p.Gly622fs21*) | F/S Del | None | None    | NA | NA | NA  | NA  | NA    | Path Ib   | PVS1, PM2, PP1-M, PP4     | N | M, On 1y, NL, CC, Hyp       |
| D2-04 | c.2078C>T (p.Pro693Leu)    | Mis     | None | 1x PATH | NA | NA | 3/3 | 7/7 | NA    | LP V      | PP1-M, PM2, PP3, PP4      | N | M, On 8y, Pr                |

NA = not applicable. **Variant Description:** #, c.358G>A (p.G120R) occurs at the last coding base of exon 2 and is predicted to weaken the donor site. ##c.212G>T (p.G71V) occurs at the first coding base of exon 2 and is predicted to weaken the acceptor site. **Variant Type:** L Del, large deletion; Mis, missense, Nons = nonsense; I/F Del, inframe deletion; F/S Del, frameshifting deletion; F/S Dup, frameshifting duplication; F/S InDel, , frameshifting deletion/insertion; Non Stop, stop codon variant. **GnomAD frequency:** frequency in the gnomAD database of "normal individuals". **ClinVar:** times described; PATH, pathogenic; LP, likely pathogenic; VUS, variant of uncertain significance. **Splicing evaluation:** HSF = Human Splice Finder, UC, unchanged; BDGP = Berkley Drosophila Gene Project, for both normal and variant score shown, and where appropriate N = score of novel site generated; **Missense evaluation:** Pre = fraction of predicted damaging pathogenicity scores from: SIFT, PolyPhen-2, Align GVGD; **Ortho** = fraction matching the human sequence in a multisequence alignment (MSA) of orthologs from mammals to fish; **Dom** = fraction matching the human sequence in MSA of conserved domains, NCBI database. **ACMG evaluation:** Class = pathogenic classification based on the American College of Medical Genetics (ACMG) guidelines for interpretation of sequence variants: Path = pathogenic, LP = likely pathogenic, VUS = variant of uncertain significance, with subclasses shown; **Evidence** = ACMG evidence supporting the interpretation of sequence variant classification. The evidence is classed as: PVS1 = pathogenic very strong; PS, pathogenic strong, PM, pathogenic moderate; PP, pathogenic supportive (see <sup>18</sup> for details). **Phenotype:** An, anemia; Au, anuria; B, bilateral; C, Consanguineous; CHF, congestive heart failure; COD/COM, calcium oxalate dihydrate/calcium oxalate monohydrate stones; CaOX, calcium oxalate stones; CDE, calcium deposits in eye; CC, congenital cataracts; dCS, duplex collecting system; EK, echogenic kidneys; ESKD, end stage kidney disease; F, female; FSGS, focal segmental glomerular sclerosis; GHD, growth hormone deficiency, Hm, Hematuria; HTN, hypertension; Hyp, hypotonia; KC, kidney cysts; KTx, kidney transplant, LTx, liver transplant; M, male; MBD, mineral bone disease; MC, macular crystals; Neph, nephrectomy; NC, nephrocalcinosis; NL, nephrolithiasis; On, age at disease onset; PN, peripheral neuropathy; Pr, proteinuria; RD, renal dysplasia, SC, staghorn calculus; SS, struvite stones; >U/Ox, high urinary oxalate; Ur, uremia; VitD def, VitD deficiency.



**Table S3: Genes with transcript and protein accession numbers**

| <b>Gene</b>     | <b>NM#</b>  | <b>NP#</b>  |
|-----------------|-------------|-------------|
| <i>AGXT</i>     | NM_000030.3 | NP_000021.1 |
| <i>ALPL</i>     | NM_000478.6 | NP_000469.3 |
| <i>APRT</i>     | NM_000485.3 | NP_000476.1 |
| <i>ATP6VOA4</i> | NM_020632.3 | NP_065683.2 |
| <i>ATP6V1B1</i> | NM_001692.4 | NP_001683.2 |
| <i>BSND</i>     | NM_057176.3 | NP_476517.1 |
| <i>CASR</i>     | NM_000388.4 | NP_000379.3 |
| <i>CLCNKB</i>   | NM_000085.5 | NP_000076.2 |
| <i>CLDN16</i>   | NM_006580.4 | NP_006571.2 |
| <i>CLDN19</i>   | NM_148960.3 | NP_683763.2 |
| <i>CYP24A1</i>  | NM_000782.5 | NP_000773.2 |
| <i>CYP27B1</i>  | NM_000785.4 | NP_000776.1 |
| <i>GRHPR</i>    | NM_012203.2 | NP_036335.1 |
| <i>HNF4A</i>    | NM_175914.4 | NP_787110.2 |
| <i>KCNJ1</i>    | NM_000220.6 | NP_000211.1 |
| <i>SLC12A1</i>  | NM_000338.3 | NP_000329.2 |
| <i>SLC12A3</i>  | NM_000339.3 | NP_000330.3 |
| <i>SLC22A12</i> | NM_144585.4 | NP_653186.2 |
| <i>SLC26A1</i>  | NM_213613.4 | NP_998778.1 |
| <i>SLC34A1</i>  | NM_003052.5 | NP_003043.3 |
| <i>SLC34A3</i>  | NM_080877.2 | NP_543153.1 |
| <i>SLC3A1</i>   | NM_000341.4 | NP_000332.2 |
| <i>SLC4A1</i>   | NM_000342.4 | NP_000333.1 |
| <i>SLC7A9</i>   | NM_014270.5 | NP_055085.1 |
| <i>SLC9A3R1</i> | NM_004252.5 | NP_004243.1 |
| <i>WNK4</i>     | NM_032387.5 | NP_115763.2 |
